# Supplementary material for: Chlorine-doped SnO2 hydrophobic surfaces for large grain perovskite solar cells
Source: Royal Society of Chemistry journal article supplement (doi:10.1039/d0tc00515k), 2020-01-01
Supplement: d0tc00515k1.pdf [file d0tc00515k1.pdf]

## Electronic Supplementary Information

### Chlorine-doped SnO<sub>2</sub> hydrophobic surface for large grain Perovskite Solar Cells

Wenxiao Gong<sup>a</sup>, Heng Guo<sup>b,\*</sup>, Haiyan Zhang<sup>a</sup>, Jian Yang<sup>a</sup>, Haiyuan Chen<sup>a</sup>, Liping Wang<sup>a</sup>,  
Feng Hao<sup>a,\*</sup> and Xiaobin Niu<sup>a,\*</sup>

<sup>a</sup>School of Materials and Energy, University of Electronic Science and Technology of China,  
Chengdu 610054, P. R. China.

<sup>b</sup>School of New Energy and Materials, Southwest Petroleum University, Chengdu, 610050,  
China.

E-mail: [heng.guo@swpu.edu.cn](mailto:heng.guo@swpu.edu.cn); [haofeng@uestc.edu.cn](mailto:haofeng@uestc.edu.cn); [xbniu@uestc.edu.cn](mailto:xbniu@uestc.edu.cn);

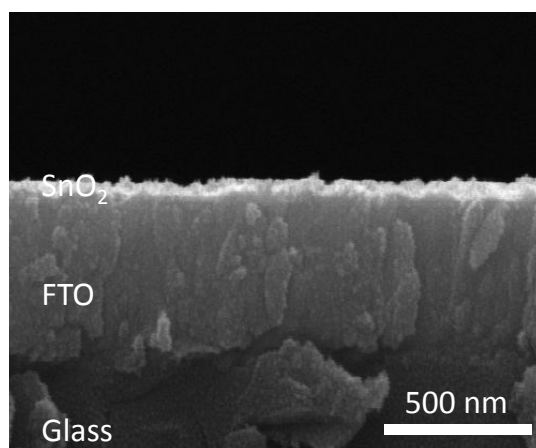

**Fig. S1** The cross-sectional SEM images of SnO<sub>2</sub>

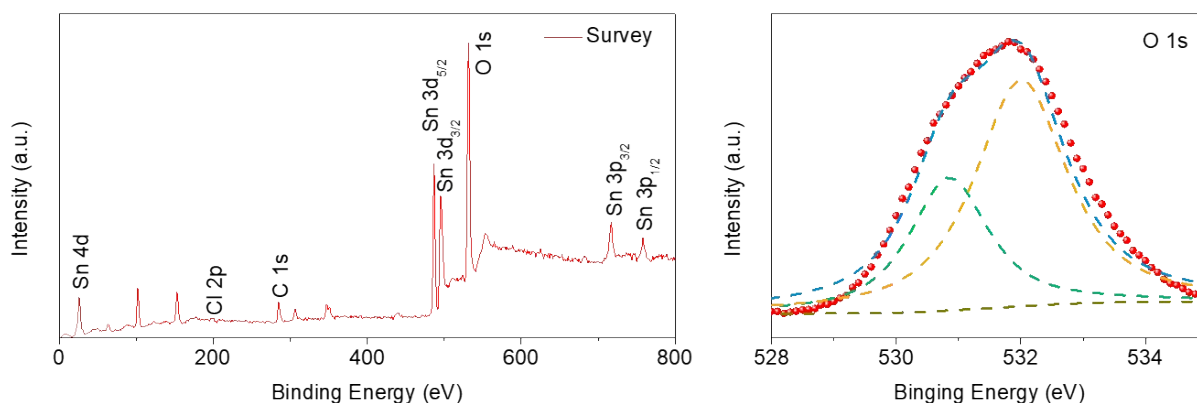

**Fig. S2** XPS survey spectrum and high resolution XPS graphs for the O elements in the SnO<sub>2</sub>-Cl colloid.

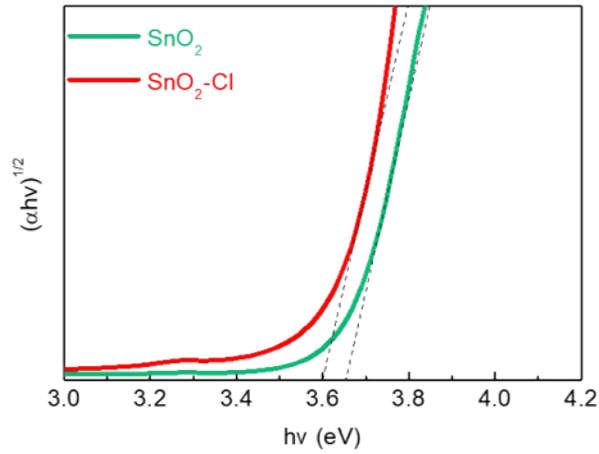

**Fig. S3** The Tauc-plots of SnO<sub>2</sub> and SnO<sub>2</sub>-Cl films coated on FTO glass. The bandgap are 3.65 eV and 3.61 eV for SnO<sub>2</sub> and SnO<sub>2</sub>-Cl can be obtained through linear extrapolation of Tauc-plots.

**Table S1.** Fitted parameters of TRPL decay curves in perovskite films with using SnO<sub>2</sub> and SnO<sub>2</sub>-Cl ETL substrates.

| ETLs                 | A <sub>1</sub> | τ <sub>1</sub><br>[ns] | A <sub>2</sub> | τ <sub>2</sub><br>[ns] | τ<br>[ns] |
|----------------------|----------------|------------------------|----------------|------------------------|-----------|
| SnO <sub>2</sub>     | 0.1521         | 1.209                  | 0.0751         | 16.042                 | 14.08     |
| SnO <sub>2</sub> -Cl | 0.6009         | 0.349                  | 0.0546         | 4.461                  | 2.56      |

The TRPL decay was fitted by a bi-exponential decay function with below equation:

$$PL_{intensity} = A_1 e^{-t/\tau_1} + A_2 e^{-t/\tau_2}$$

where  $A_1$  and  $A_2$  are time-independent coefficients of amplitude fraction for each decay component,  $\tau_1$  and  $\tau_2$  are decay time of a fast and slow component, respectively.

**Table S2.** Photovoltaic parameters of the PSCs measured under different scan directions.

| ETLs                 | Scan direction | V <sub>OC</sub><br>[V] | J <sub>SC</sub><br>[mA cm <sup>-2</sup> ] | FF<br>[%] | PCE<br>[%] | R <sub>S</sub><br>[Ω cm <sup>2</sup> ] | R <sub>SH</sub><br>[Ω cm <sup>2</sup> ] | HI <sup>(a)</sup> |
|----------------------|----------------|------------------------|-------------------------------------------|-----------|------------|----------------------------------------|-----------------------------------------|-------------------|
| SnO <sub>2</sub>     | Forward        | 0.99                   | 21.09                                     | 60.2      | 12.6       | 142.4                                  | 6340.4                                  | 0.104             |
|                      | Reverse        | 1.0                    | 22.7                                      | 66.1      | 15.07      | 124.1                                  | 18187.6                                 |                   |
| SnO <sub>2</sub> -Cl | Forward        | 1.1                    | 23.3                                      | 69.7      | 18.0       | 83.6                                   | 29151.1                                 | 0.013             |
|                      | Reverse        | 1.1                    | 23.6                                      | 69.2      | 18.1       | 118.0                                  | 37471.9                                 |                   |

Hysteresis index

**Table S3.** The average photovoltaic parameters of the PSCs fabricated by using SnO<sub>2</sub> and SnO<sub>2</sub>-Cl ETLs, which are extracted from measuring current density-voltage curves at simulated one sun illumination (100 mW cm<sup>-2</sup>, AM 1.5 G)

| ETLs                 | $V_{OC}$<br>[V] | $J_{SC}$<br>[mA cm <sup>-2</sup> ] | FF<br>[%]    | PCE <sup>a)</sup><br>[%] |
|----------------------|-----------------|------------------------------------|--------------|--------------------------|
| SnO <sub>2</sub>     | 1.01 ± 0.06     | 21.02 ± 3.93                       | 59.64 ± 5.87 | 13.36 ± 1.8              |
| SnO <sub>2</sub> -Cl | 1.08 ± 0.02     | 23.02 ± 0.91                       | 69.38 ± 1.72 | 17.35 ± 0.56             |

Maximum values are in parentheses.
